# Supplementary material for: Identification and characterization of the key enzyme in the biosynthesis of the neurotoxin β-ODAP in grass pea
Source: PubMed Central journal article supplement — J Biol Chem. 2022 Mar 7;298(5):101806. doi: 10.1016/j.jbc.2022.101806 (PMC9061259; doi:10.1016/j.jbc.2022.101806), 2022-03-07
Supplement: mmc6.pdf [file mmc6.pdf]

**Supplementary Table S1: Summary of PacBio long-read cDNA sequencing**

|                                          |                |
|------------------------------------------|----------------|
| Number of reads of insert (ROI)          | 15,046,014     |
| Number of read bases of insert           | 24,422,044,159 |
| Average length of ROI (bp)               | 1,623          |
| Number of non-full-length PacBio reads   | 65,228         |
| Number of FLNC <sup>a</sup> PacBio reads | 473,833        |
| Average length of FLNC PacBio reads (bp) | 1,764          |
| Number of polished high-quality reads    | 39,350         |
| Number of polished low-quality reads     | 183            |

<sup>a</sup> FLNC – Full-length, non-concatemer
