# Supplementary material for: Identification and characterization of the key enzyme in the biosynthesis of the neurotoxin β-ODAP in grass pea
Source: PubMed Central journal article supplement — J Biol Chem. 2022 Mar 7;298(5):101806. doi: 10.1016/j.jbc.2022.101806 (PMC9061259; doi:10.1016/j.jbc.2022.101806), 2022-03-07
Supplement: mmc7.pdf [file mmc7.pdf]

**Supplementary Table S2. Proteins identified in catalytically active samples\***

|                                     | <b>BOS-1</b> | <b>BOS-2</b> | <b>BOS-3</b> | <b>BOS-4</b> |
|-------------------------------------|--------------|--------------|--------------|--------------|
| Total number of proteins found      | 1960         | 1473         | 740          | 244          |
| Proteins shared with some samples   | 1188         | 1182         | 479          | 22           |
| Proteins shared between all samples | 219          |              |              |              |
| Unique proteins                     | 550          | 72           | 42           | 3            |

\*Proteins were identified using the SequestHT (64) and Mascot (65) search engines, searching against the translated transcriptome as the protein database.
