# Supplementary material for: Identification and characterization of the key enzyme in the biosynthesis of the neurotoxin β-ODAP in grass pea
Source: PubMed Central journal article supplement — J Biol Chem. 2022 Mar 7;298(5):101806. doi: 10.1016/j.jbc.2022.101806 (PMC9061259; doi:10.1016/j.jbc.2022.101806), 2022-03-07
Supplement: mmc8.pdf [file mmc8.pdf]

### Supplementary Table S3: Data collection and refinement statistics for BOS

---

| <b>Data Collection</b>                     |                                     |
|--------------------------------------------|-------------------------------------|
| PDB code                                   | 6ZBS                                |
| Space group                                | <i>P4<sub>3</sub>2<sub>1</sub>2</i> |
| Cell dimensions:                           |                                     |
| a,b,c (Å)                                  | 66.20 66.20 226.38                  |
| $\alpha,\beta,\gamma$ (°)                  | 90, 90, 90                          |
| No. of copies in a.u.                      | 1                                   |
| Resolution (Å)                             | 45.84-2.35                          |
| <hr/>                                      |                                     |
| Upper resolution shell (Å)                 | 2.434-2.35                          |
| Unique reflections                         | 21,933 (2,130)                      |
| Completeness (%)                           | 99.83 (99.77)                       |
| Multiplicity                               | 19.3 (21.1)                         |
| Average $I/\sigma(I)$                      | 49.73 (5.75)                        |
| R-pim                                      | 0.165 (0.2717)                      |
| CC1/2                                      | 0.75 (0.824)                        |
| <hr/>                                      |                                     |
| <b>Refinement</b>                          |                                     |
| Resolution range (Å)                       | 45.84-2.35                          |
| No. of reflections ( $I/\sigma(I) > 0$ )   | 21,906                              |
| No. of reflections in test set             | 1,112                               |
| R-working / R-free                         | 0.2059 / 0.2590                     |
| No. of protein atoms                       | 3324                                |
| No. of water molecules                     | 111                                 |
| Overall average B factor (Å <sup>2</sup> ) | 43.73                               |
| Root mean square deviations:               |                                     |
| - bond length (Å)                          | 0.006                               |
| - bond angle (°)                           | 0.85                                |
| <hr/>                                      |                                     |
| <b>Ramachandran Plot</b>                   |                                     |
| Most favored (%)                           | 95.45                               |
| Additionally allowed (%)                   | 3.83                                |
| Disallowed (%)                             | 0.72                                |

\* Values in parentheses refer to the data of the corresponding upper resolution shell.
