# Supplementary material for: Identification and characterization of the key enzyme in the biosynthesis of the neurotoxin β-ODAP in grass pea
Source: PubMed Central journal article supplement — J Biol Chem. 2022 Mar 7;298(5):101806. doi: 10.1016/j.jbc.2022.101806 (PMC9061259; doi:10.1016/j.jbc.2022.101806), 2022-03-07
Supplement: mmc9.pdf [file mmc9.pdf]

**Supplementary Table S4: Top docking scores of BOS with CoA substrates**

| Result # | Ligand      | Docking score <sup>a</sup> | Distance [Å] <sup>b</sup> | Angle [deg] <sup>c</sup> | Interacting Residues |
|----------|-------------|----------------------------|---------------------------|--------------------------|----------------------|
| 1        | Oxalyl-CoA  | -10.084                    | 3.51                      | 99                       | N38, K40-salt bridge |
| 2        | Oxalyl-CoA  | -10.023                    | 3.48                      | 102.4                    | N38, K40-salt bridge |
| 3        | Oxalyl-CoA  | -9.972                     | 3.34                      | 99.5                     | N38, K40-salt bridge |
| 4        | Oxalyl-CoA  | -9.543                     | 3.48                      | 98.9                     | N38, K40-salt bridge |
| 5        | Oxalyl-CoA  | -9.441                     | 3.64                      | 113.3                    | N38, K40-salt bridge |
| 6        | Acetyl-CoA  | -9.436                     | 3.2                       | 102.1                    | K40-H-Bond           |
| 7        | Malonyl-CoA | -11.902                    | 4.58                      | 59.5                     | R288, T168, G167     |
| 8        | CoA         | -9.602                     | -                         | -                        | -                    |
| 9        | CoA         | -9.418                     | -                         | -                        | -                    |

a. Score of the interaction between the ligand, L-DAPA and BOS calculated by 3 body docking. The more negative the score, the stronger the predicted interaction.

b. Distance between the thioester carbonyl carbon of the ligand and the nucleophilic nitrogen of L-DAPA.

c. The Büergi-Dunitz angle between the carbonyl vector and the vector defined by the L-DAPA nucleophile and the carbonyl vector.
