# Supplementary material for: Identification and characterization of the key enzyme in the biosynthesis of the neurotoxin β-ODAP in grass pea
Source: PubMed Central journal article supplement — J Biol Chem. 2022 Mar 7;298(5):101806. doi: 10.1016/j.jbc.2022.101806 (PMC9061259; doi:10.1016/j.jbc.2022.101806), 2022-03-07
Supplement: mmc10.pdf [file mmc10.pdf]

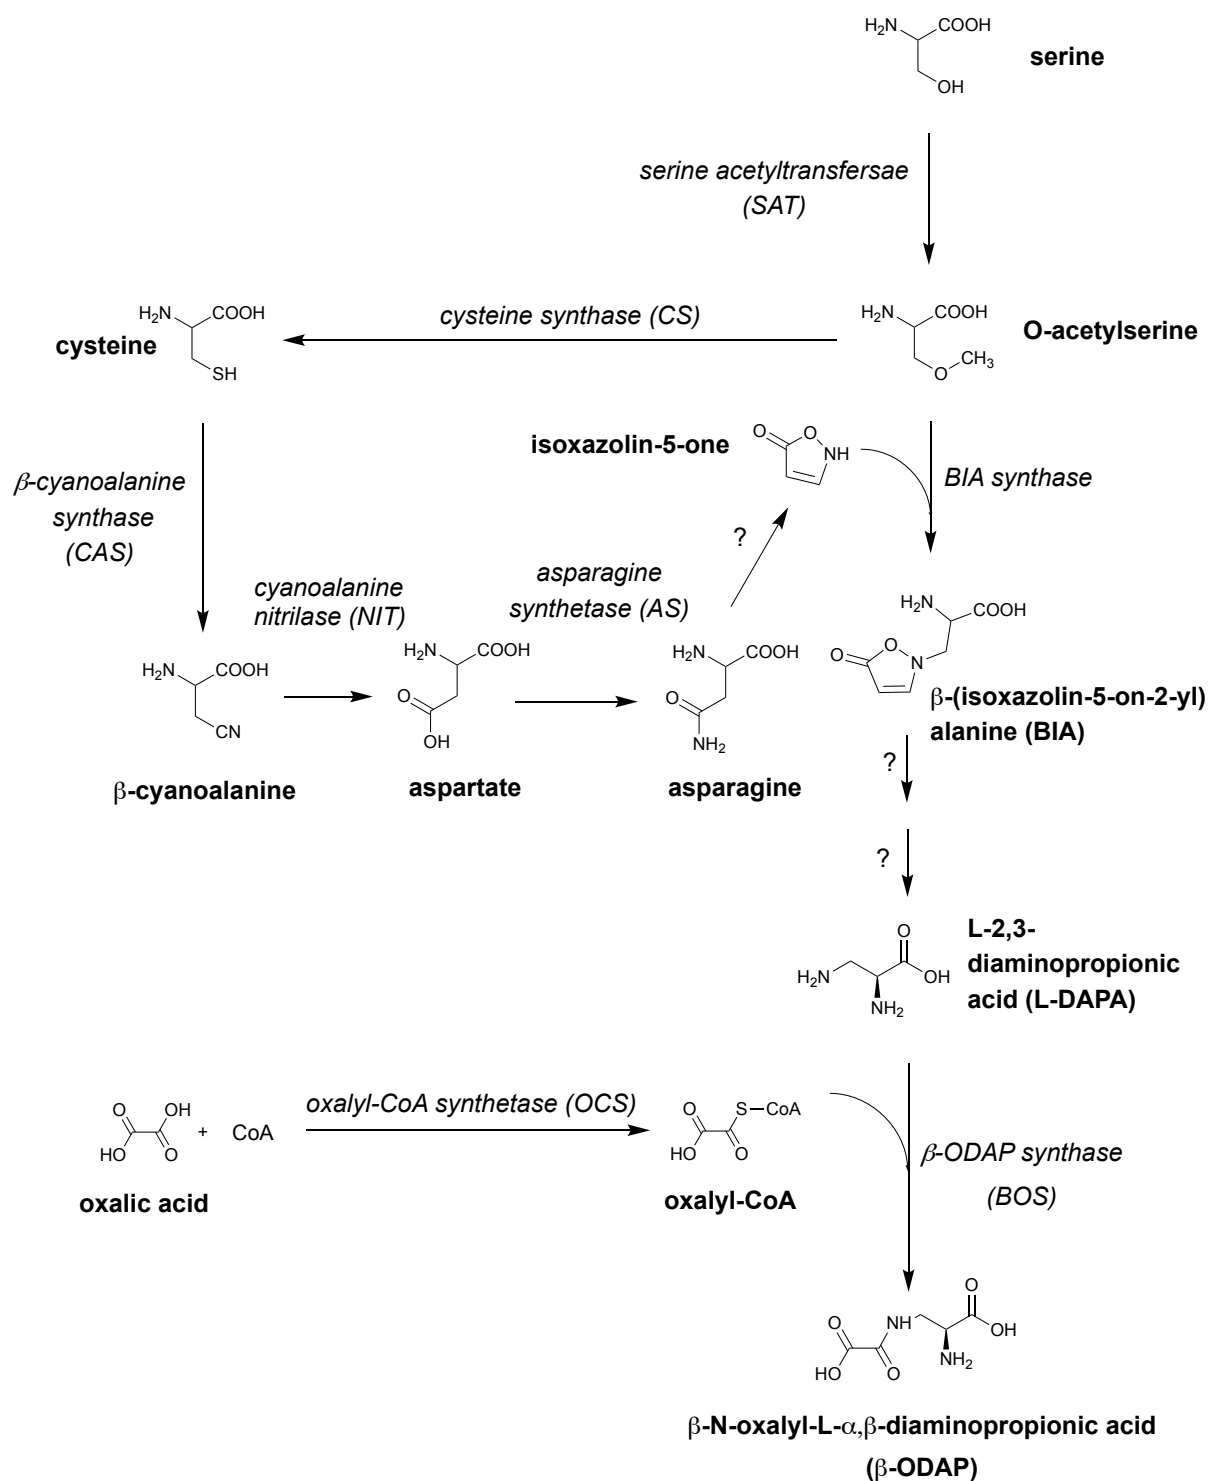

**Supplementary Scheme 1.** Biosynthetic Pathway for  $\beta$ -ODAP in grass.

The names of reactants and products of the pathway are shown in bold font and the enzymes associated with the pathway are italicized.
