# Supplementary material for: Identification and characterization of the key enzyme in the biosynthesis of the neurotoxin β-ODAP in grass pea
Source: PubMed Central journal article supplement — J Biol Chem. 2022 Mar 7;298(5):101806. doi: 10.1016/j.jbc.2022.101806 (PMC9061259; doi:10.1016/j.jbc.2022.101806), 2022-03-07
Supplement: mmc11.pdf [file mmc11.pdf]

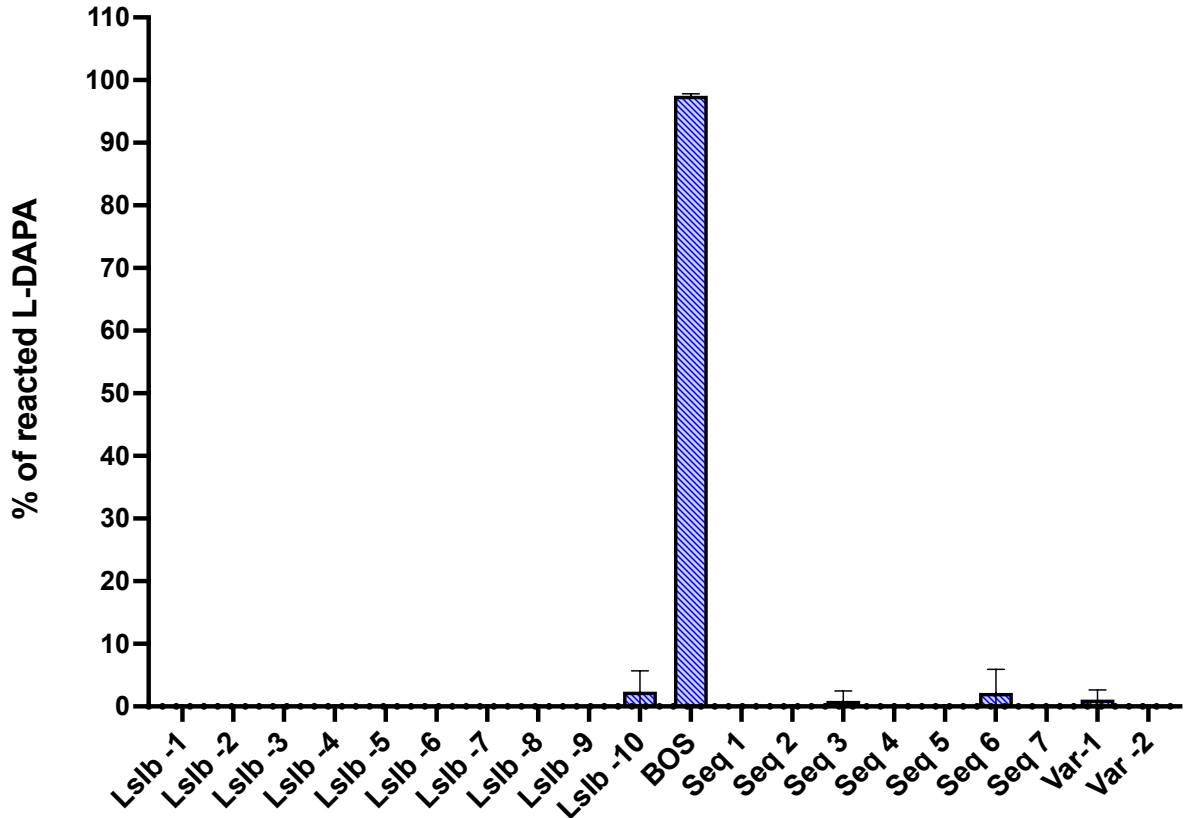

**Supplementary Figure S1. BOS activity of purified grass pea proteins.** Selected ORFs from the grass pea transcriptome were cloned, expressed and purified from *E.coli* cells. The reduction in free L-DAPA concentrations was assayed *in-vitro* as a proxy for BOS activity (**Experimental Procedures**). Clade Ib proteins of the BAHD superfamily are indicated as Lslb-1 to 10. BOS indicates the wild-type BOS protein. Seq 1-7 protein sequences and annotations are listed in **SI Appendix C**. Var-1 and Var-2 indicate BOS mutants H162Q and D166S, respectively. Data represents the mean  $\pm$  SD of 2-3 replicate measurements.
