# Supplementary material for: Identification and characterization of the key enzyme in the biosynthesis of the neurotoxin β-ODAP in grass pea
Source: PubMed Central journal article supplement — J Biol Chem. 2022 Mar 7;298(5):101806. doi: 10.1016/j.jbc.2022.101806 (PMC9061259; doi:10.1016/j.jbc.2022.101806), 2022-03-07
Supplement: mmc12.pdf [file mmc12.pdf]

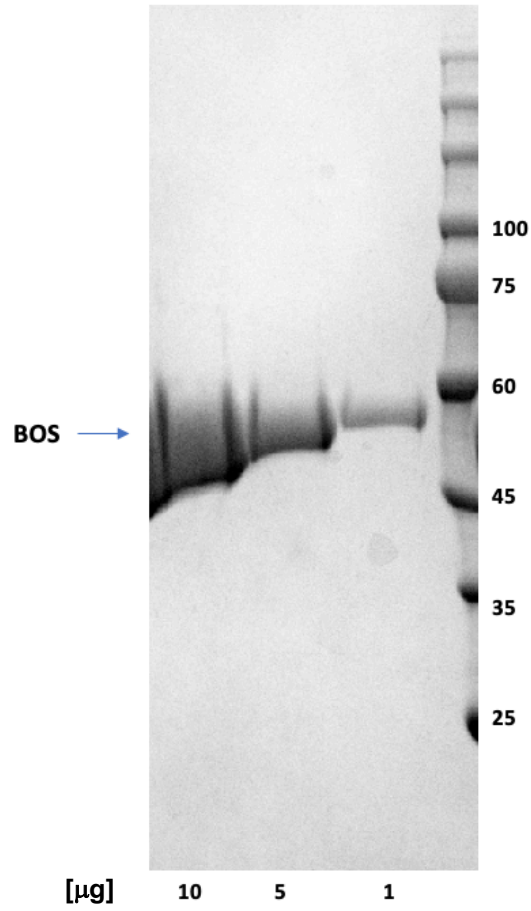

**Supplementary Figure S2. SDS-PAGE gel of purified BOS.**

Increasing amounts of purified BOS were run on a 12% SDS-PAGE gel stained with Coomassie blue. Right lane, molecular weight markers.
