# Supplementary material for: Identification and characterization of the key enzyme in the biosynthesis of the neurotoxin β-ODAP in grass pea
Source: PubMed Central journal article supplement — J Biol Chem. 2022 Mar 7;298(5):101806. doi: 10.1016/j.jbc.2022.101806 (PMC9061259; doi:10.1016/j.jbc.2022.101806), 2022-03-07
Supplement: mmc13.pdf [file mmc13.pdf]

S3a.

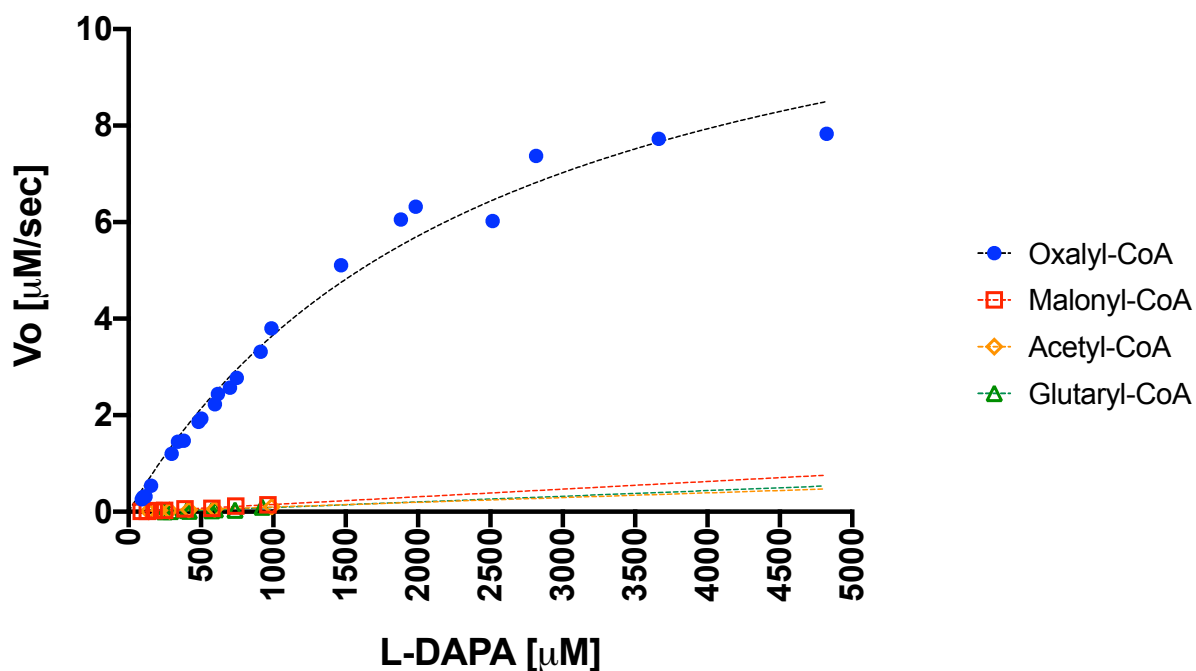

S3b.

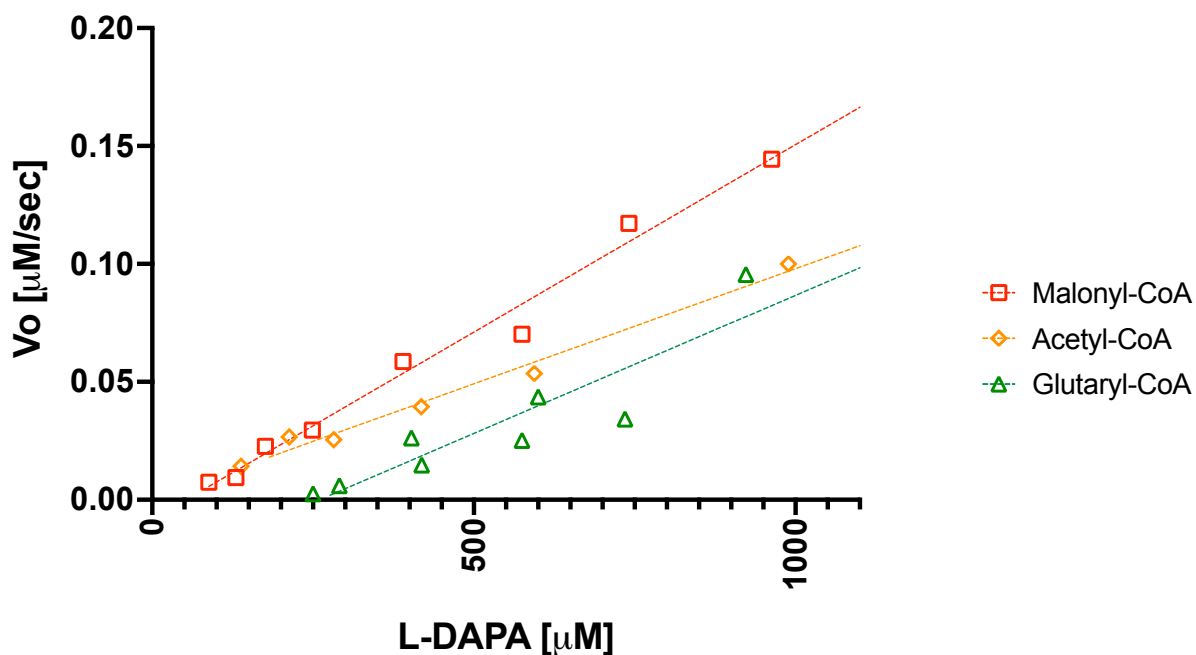

**Supplementary Figure S3. Kinetics of CoA substrate ligation to L-DAPA catalyzed by BOS.** **a.** *In vitro* generated oxalyl-CoA (6mM) or commercially obtained acetyl-CoA (2mM), malonyl-CoA (2mM) or glutaryl-CoA (2mM) were mixed with different concentrations of L-DAPA (0.09-4.8mM) and purified BOS (0.1 $\mu\text{M}$ ) at R.T. Initial velocities ( $V_0$ ) were determined by measuring residual L-DAPA concentrations at different time points. **b.** The initial velocities of reactions with acetyl-, malonyl- and glutaryl-CoA were much lower than with oxalyl-CoA, displayed linear progression curves and were, therefore, measured only up to an L-DAPA concentration of 1mM. Kinetic constants were derived by fitting the data to the Michaelis-Menten equation

(for oxalyl-CoA) or by linear regression (other acyl-CoA substrates) using GraphPad Prism 8.4.3 (GraphPad Software, San Diego, California USA.)
