# Supplementary material for: Identification and characterization of the key enzyme in the biosynthesis of the neurotoxin β-ODAP in grass pea
Source: PubMed Central journal article supplement — J Biol Chem. 2022 Mar 7;298(5):101806. doi: 10.1016/j.jbc.2022.101806 (PMC9061259; doi:10.1016/j.jbc.2022.101806), 2022-03-07
Supplement: mmc15.pdf [file mmc15.pdf]

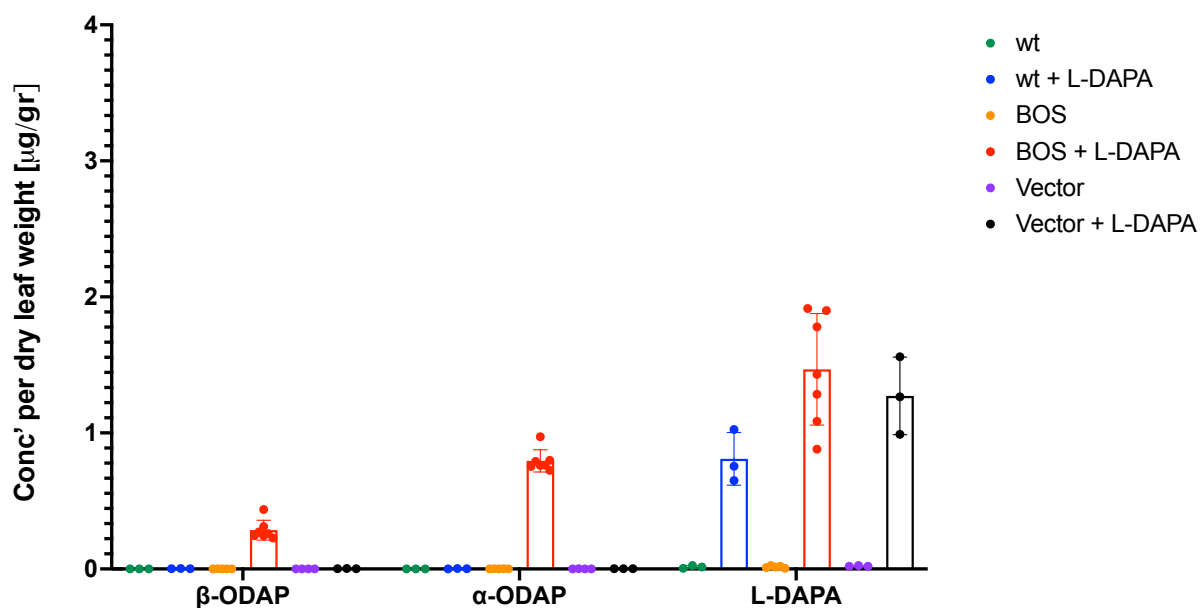

**Supplementary Figure S5. Production of  $\alpha/\beta$ -ODAP in *N. benthamiana* leaves transiently expressing BOS.** Shown are the concentrations of L-DAPA,  $\alpha$ - and  $\beta$ -ODAP in leaves from untreated plants (wt, green circles), plants injected with L-DAPA (wt + L-DAPA, blue circles), plants infiltrated with *A. tumefaciens* cells expressing BOS (BOS, orange circles), plants infiltrated with *A. tumefaciens* cells expressing BOS and injected with L-DAPA (BOS + L-DAPA, red circles), plants infiltrated with *A. tumefaciens* cells transformed with an empty vector (Vector, purple) and plants infiltrated with *A. tumefaciens* cells transformed with an empty vector and injected with L-DAPA (Vector + L-DAPA, black circles). The concentrations of L-DAPA,  $\alpha$ - and  $\beta$ -ODAP in extracted leaf samples were determined by LC-MS. Data represent the mean  $\pm$  SD of 3 to 7 replicate samples.
