# Supplementary material for: Identification and characterization of the key enzyme in the biosynthesis of the neurotoxin β-ODAP in grass pea
Source: PubMed Central journal article supplement — J Biol Chem. 2022 Mar 7;298(5):101806. doi: 10.1016/j.jbc.2022.101806 (PMC9061259; doi:10.1016/j.jbc.2022.101806), 2022-03-07
Supplement: mmc16.pdf [file mmc16.pdf]

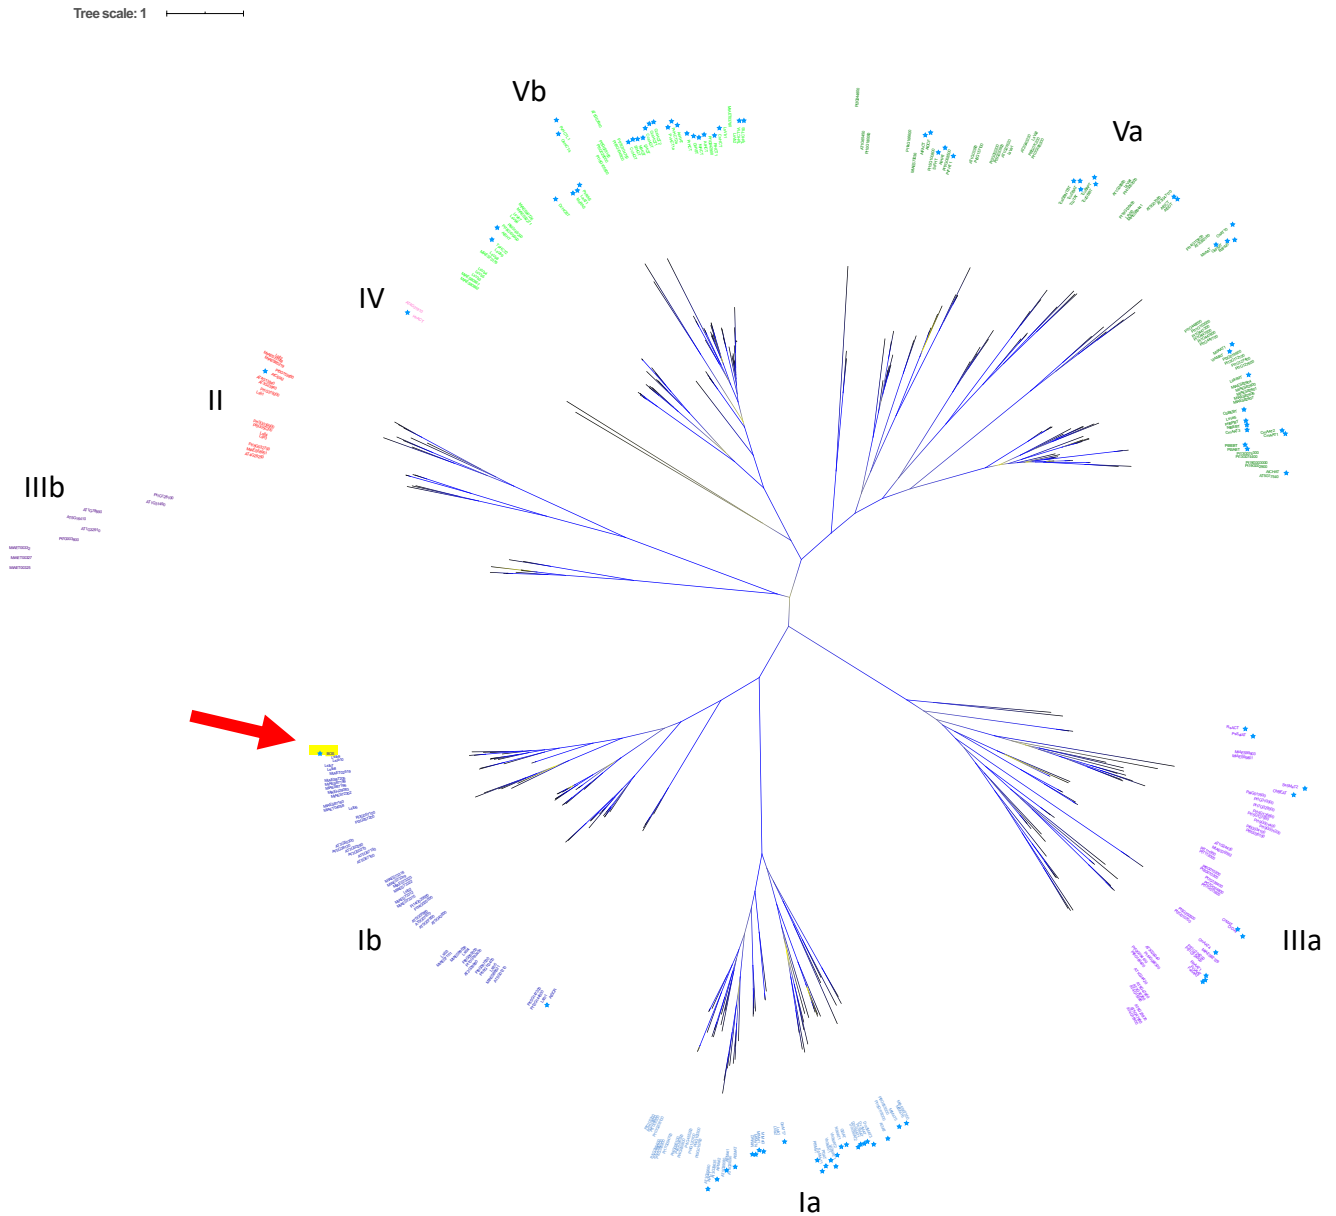

**Supplementary Figure S6. Unrooted phylogenetic tree with support coloring.**

The phylogenetic tree from **Figure 3** is shown in unrooted form with support values colored in a range from blue (1) to yellow (0). Sequences are colored according to clade: IIIb (dark purple), II (red), IV (pink), Vb (light green), Va (dark green), IIIa (light purple), Ia (light blue), Ib (dark blue). Sequences with known function are starred; BOS has a yellow background and is marked by a red arrow.
