# Supplementary material for: Identification and characterization of the key enzyme in the biosynthesis of the neurotoxin β-ODAP in grass pea
Source: PubMed Central journal article supplement — J Biol Chem. 2022 Mar 7;298(5):101806. doi: 10.1016/j.jbc.2022.101806 (PMC9061259; doi:10.1016/j.jbc.2022.101806), 2022-03-07
Supplement: mmc17.pdf [file mmc17.pdf]

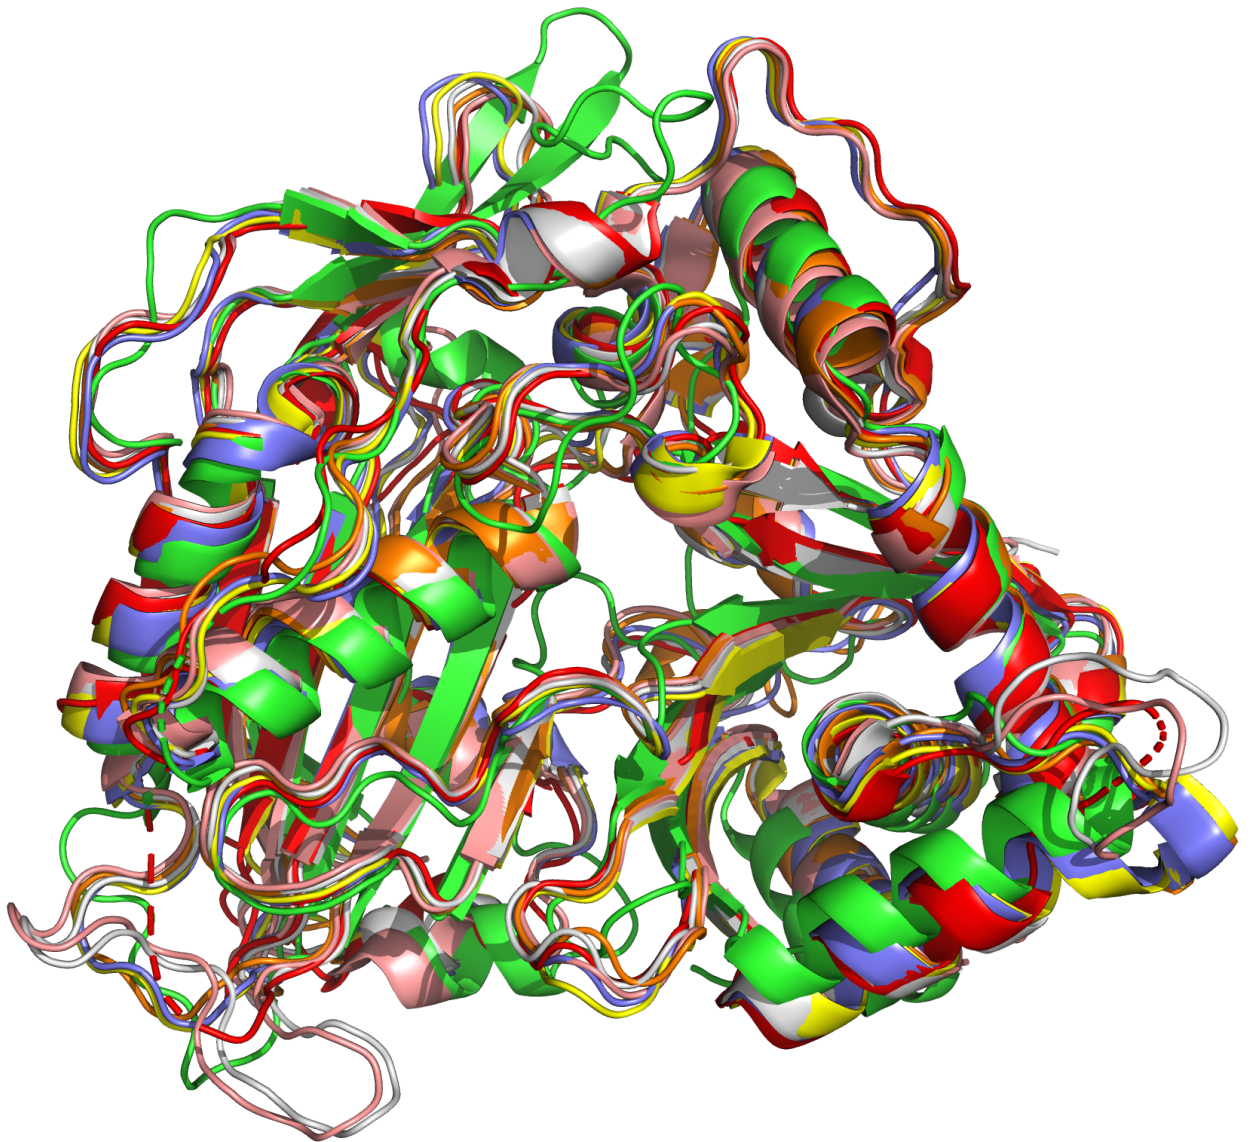

**Supplementary Figure S7. Structural overlay of BOS with five homologs.** The structure of BOS (green) was aligned with the structures of six hydroxycinnamoyl transferases from: *Selaginella moellendorffii* (PDB ID: 6DD2, red), *Arabidopsis thaliana* (PDB ID: 5KJU, orange), *Coffea canephora* (PDB ID: 4G0B, yellow), *Panicum virgatum* (PDB ID: 5FAL, pink), *Sorghum bicolor* (PDB ID: 4KE4, gray), and *Plectranthus scutellarioides* (PDB ID: 5KJV, purple). The figure was generated using PyMol (Molecular Graphics System, version 2.4, Schrödinger, LLC).
