# Supplementary material for: Identification and characterization of the key enzyme in the biosynthesis of the neurotoxin β-ODAP in grass pea
Source: PubMed Central journal article supplement — J Biol Chem. 2022 Mar 7;298(5):101806. doi: 10.1016/j.jbc.2022.101806 (PMC9061259; doi:10.1016/j.jbc.2022.101806), 2022-03-07
Supplement: mmc20.pdf [file mmc20.pdf]

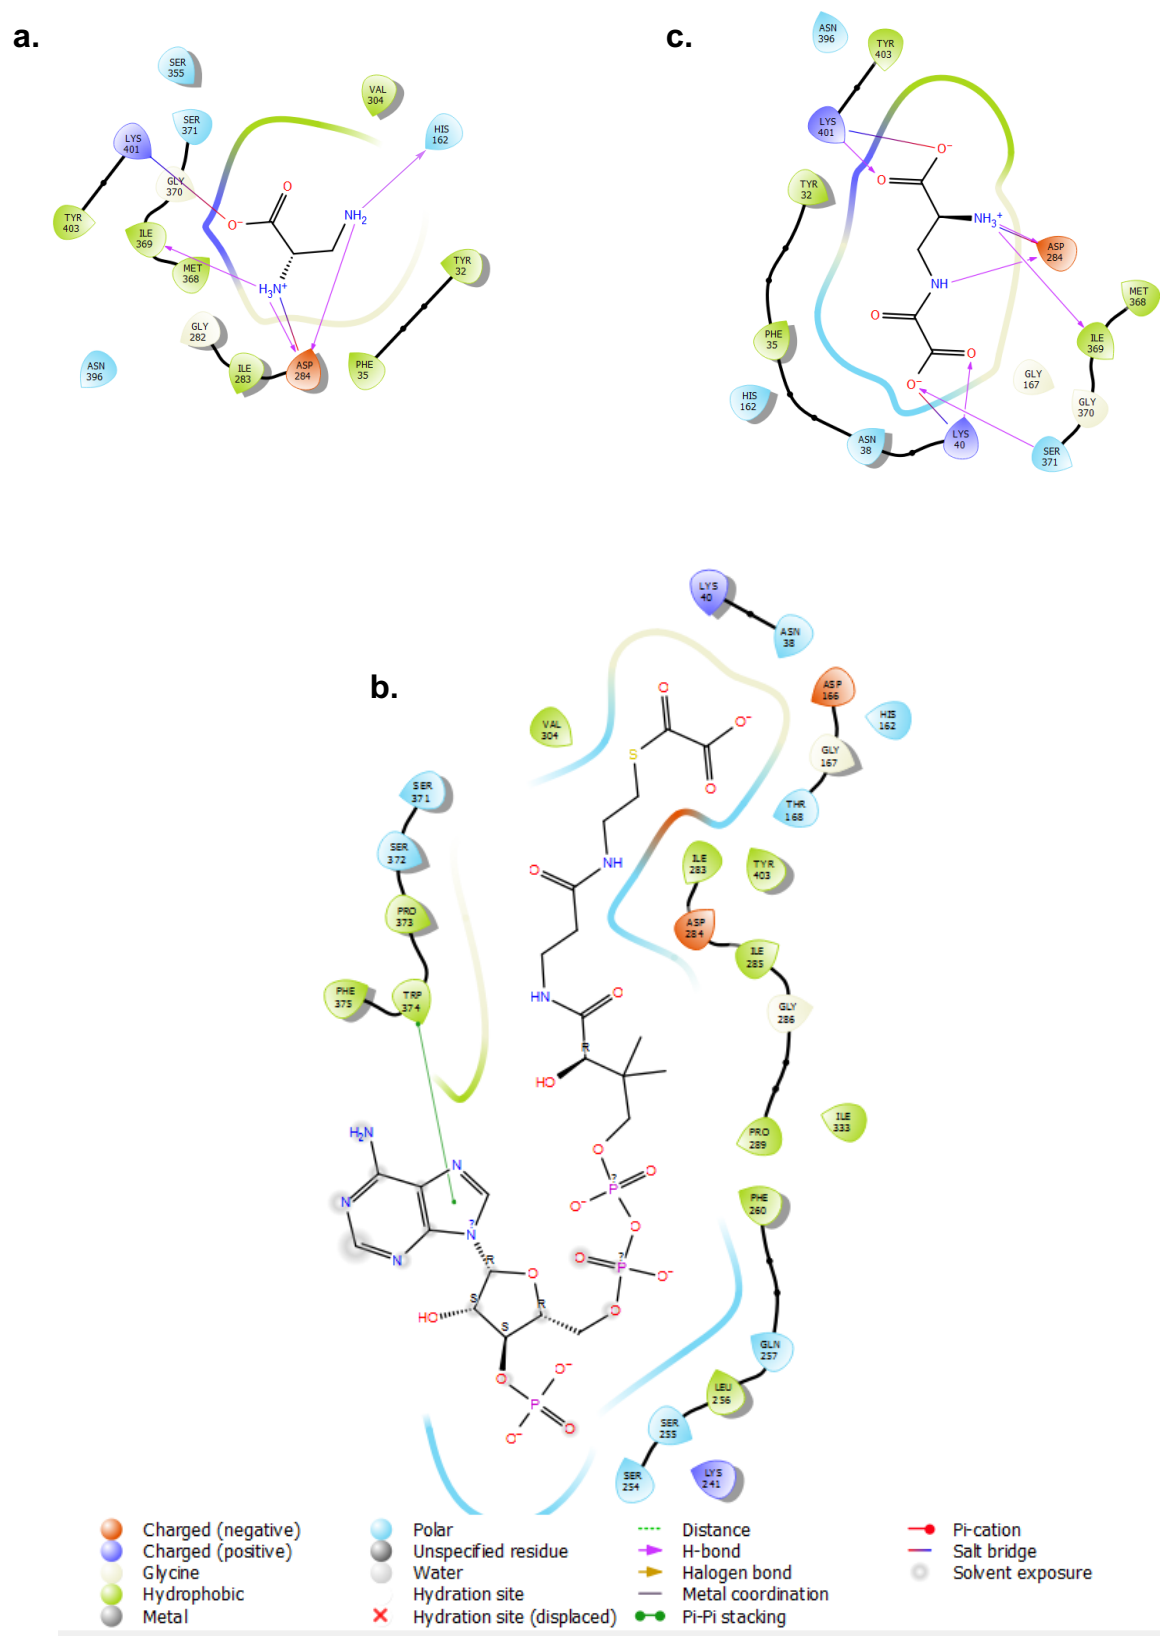

**Supplementary Figure S10. Interaction maps of BOS with its ligands and product.** The panels depict the interactions of BOS with L-DAPA (a), oxalyl-CoA (b) and  $\beta$ -ODAP (c). Protein-ligand interactions were derived from individual docking studies and the interaction diagrams were generated using GLIDE (Schrödinger, LLC)
